# Supplementary material for: AMH regulates ovarian granulosa cell growth in PCOS rats through SMAD4
Source: Research Square preprint supplement (doi:10.21203/rs.3.rs-3898730/v1), 2024-01-31
Supplement: Supplementary file 1 [file c2f7abea1f147337be4f03f0.docx]

**Table 1** Primers for SMAD4 and GAPDH

| Gene name | Primer sequence (5’-3’) | Product length |
| --- | --- | --- |
| SMAD4 | F:CAGCCAGGACAGCAGCAGAATG | 229bp |
|  | R:CAGGAGCAGGATGATTGGAAATGGG |  |
| GAPDH | F:ACTCCCATTCTTCCACCTTTG | 446bp |
|  | R:CCCTGTTGCTGTAGCCATATT |  |
